# Supplementary material
Source: ML conference proceedings conference paper supplement (https://proceedings.neurips.cc/paper_files/paper/2016/hash/eb163727917cbba1eea208541a643e74-Abstract.html)
Supplement: Supplementary file 1 [file eb163727917cbba1eea208541a643e74-Supplemental.zip]

Archive with 1 entries (1 files):
- Teymur_Appendices.pdf
